# Supplementary material for: Divergent gene expression in the conserved dauer stage of the nematodes Pristionchus pacificus and Caenorhabditis elegans
Source: PubMed Central journal article supplement (PMC3443458; doi:10.1186/1471-2164-13-254), 2012-06-19

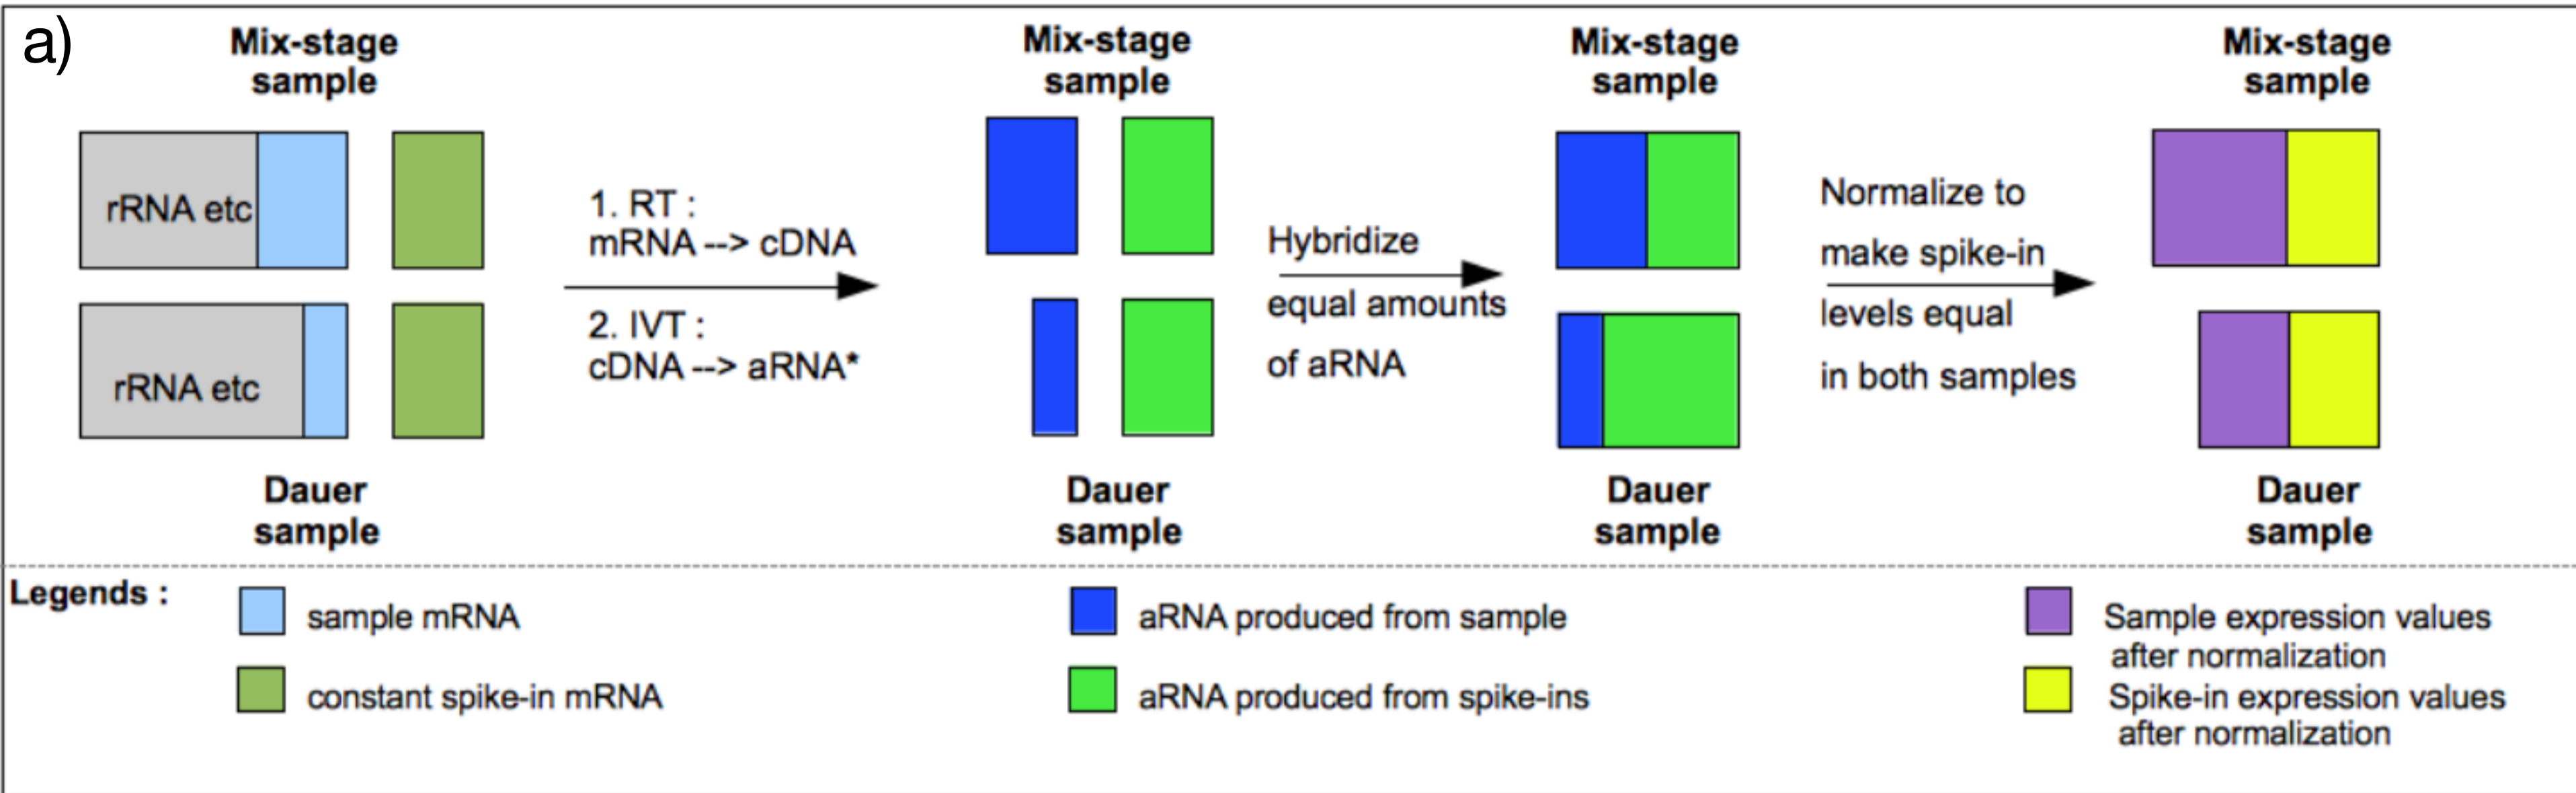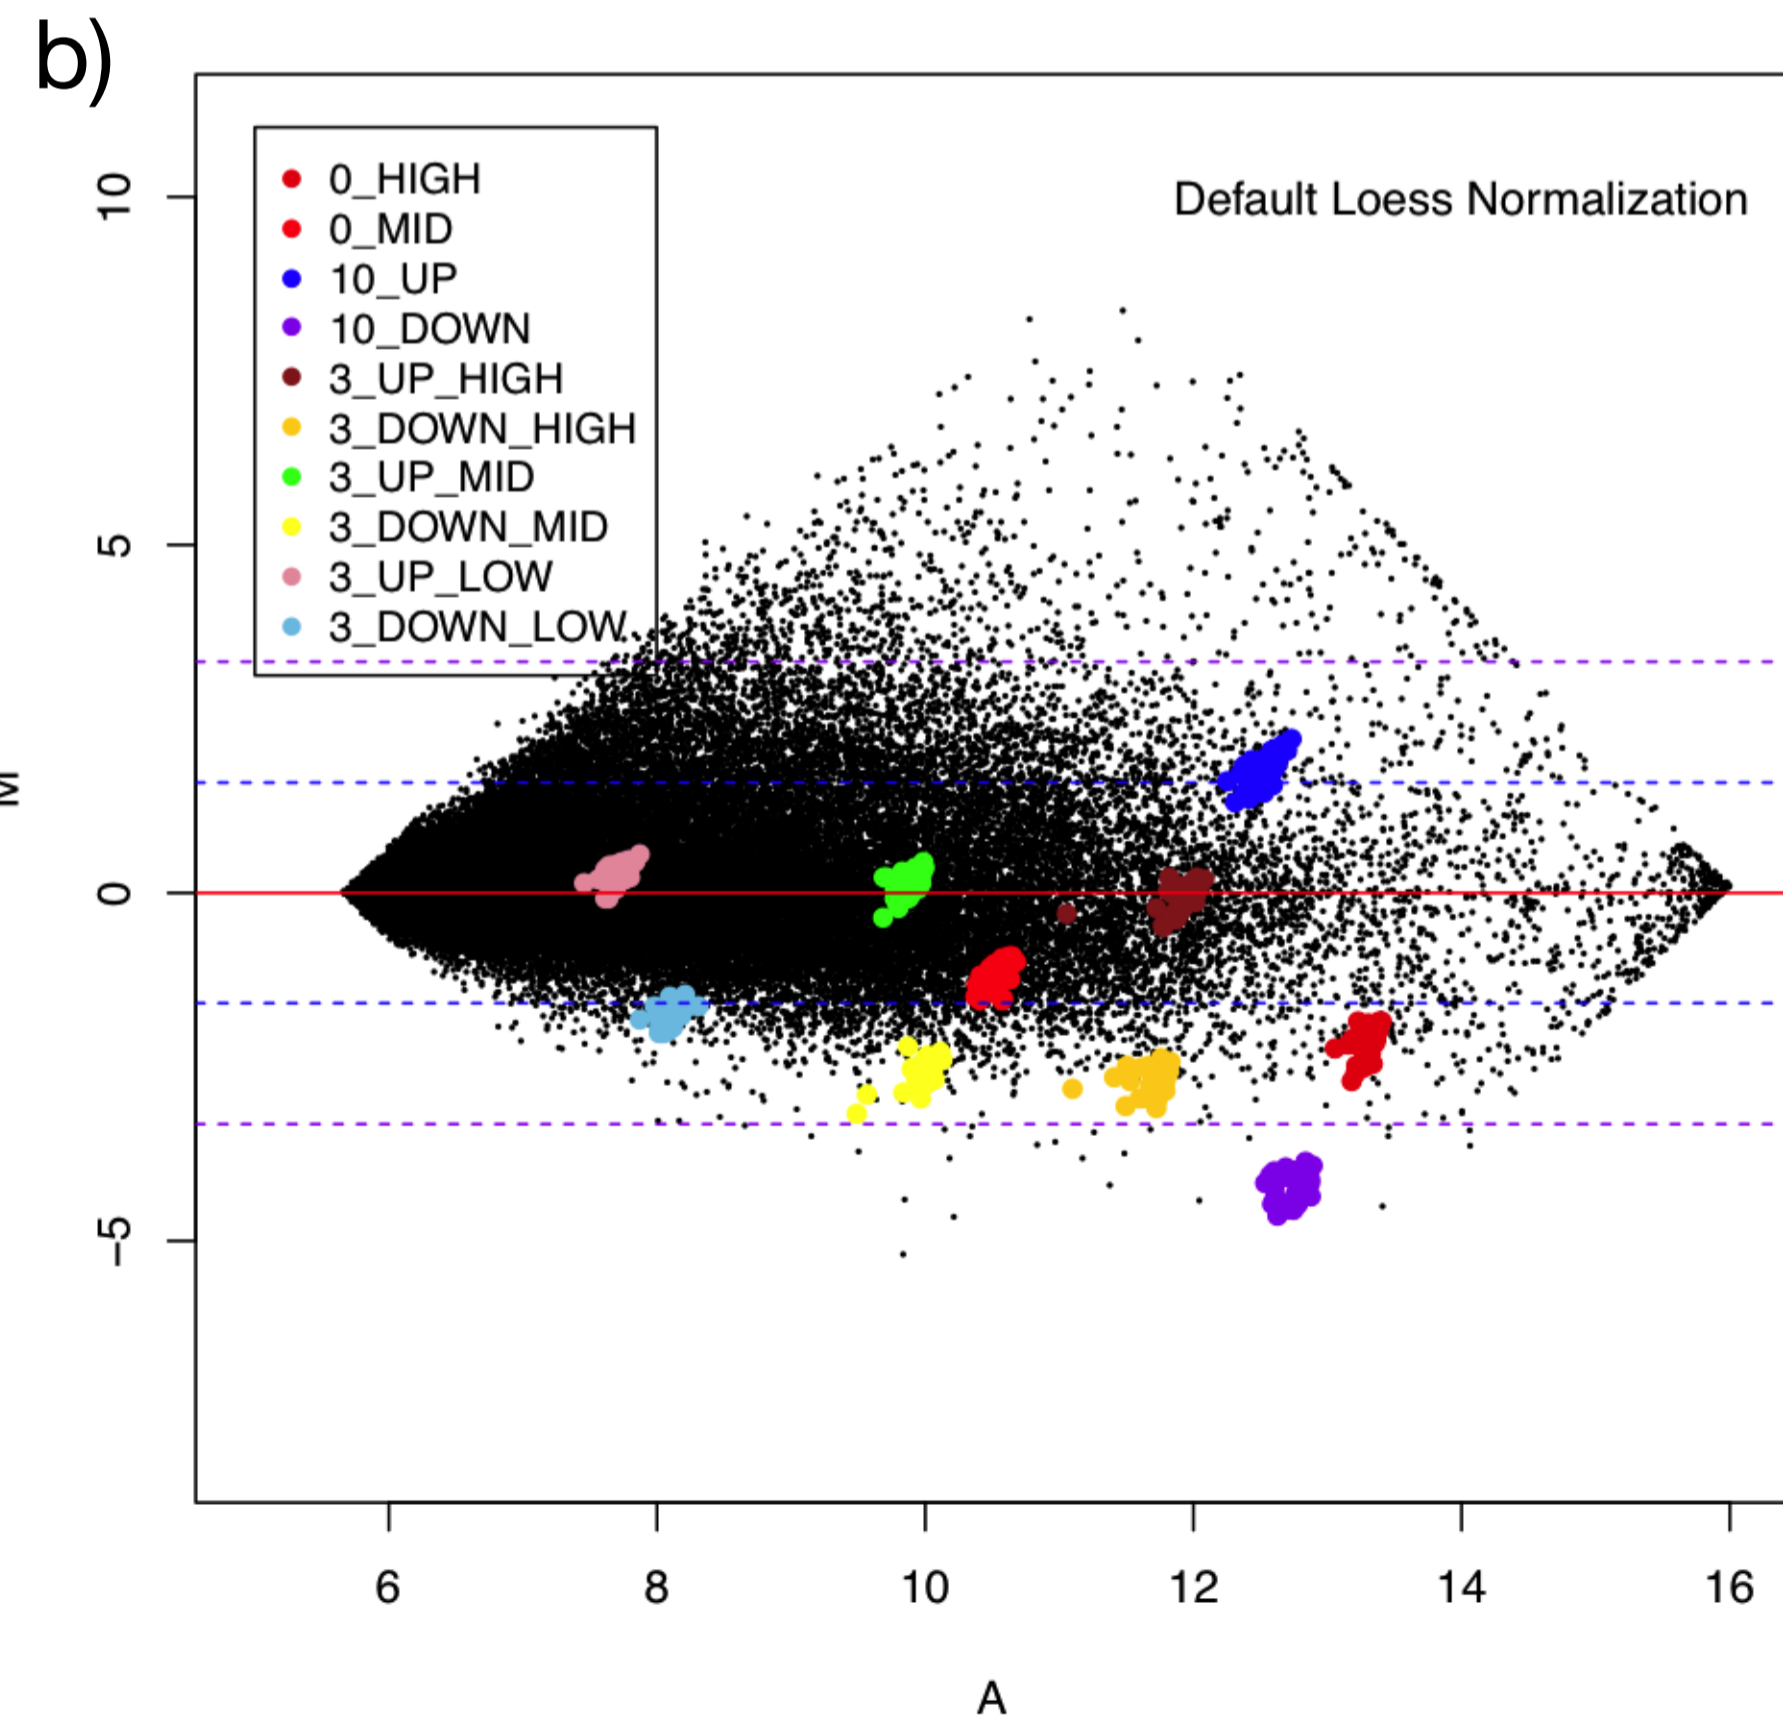

c)

***C. elegans* Dauer vs Mix stage comparison**

|              | Default Loess | Weighted loess |
|--------------|---------------|----------------|
| UP           | 1991          | 1099           |
| DOWN         | 2681          | 3162           |
| <b>Total</b> | <b>4672</b>   | <b>4261</b>    |

***P. pacificus* Dauer vs Mix stage comparison**

|              | Default Loess | Weighted loess |
|--------------|---------------|----------------|
| UP           | 5166          | 3910           |
| DOWN         | 5748          | 6121           |
| <b>Total</b> | <b>10914</b>  | <b>10031</b>   |

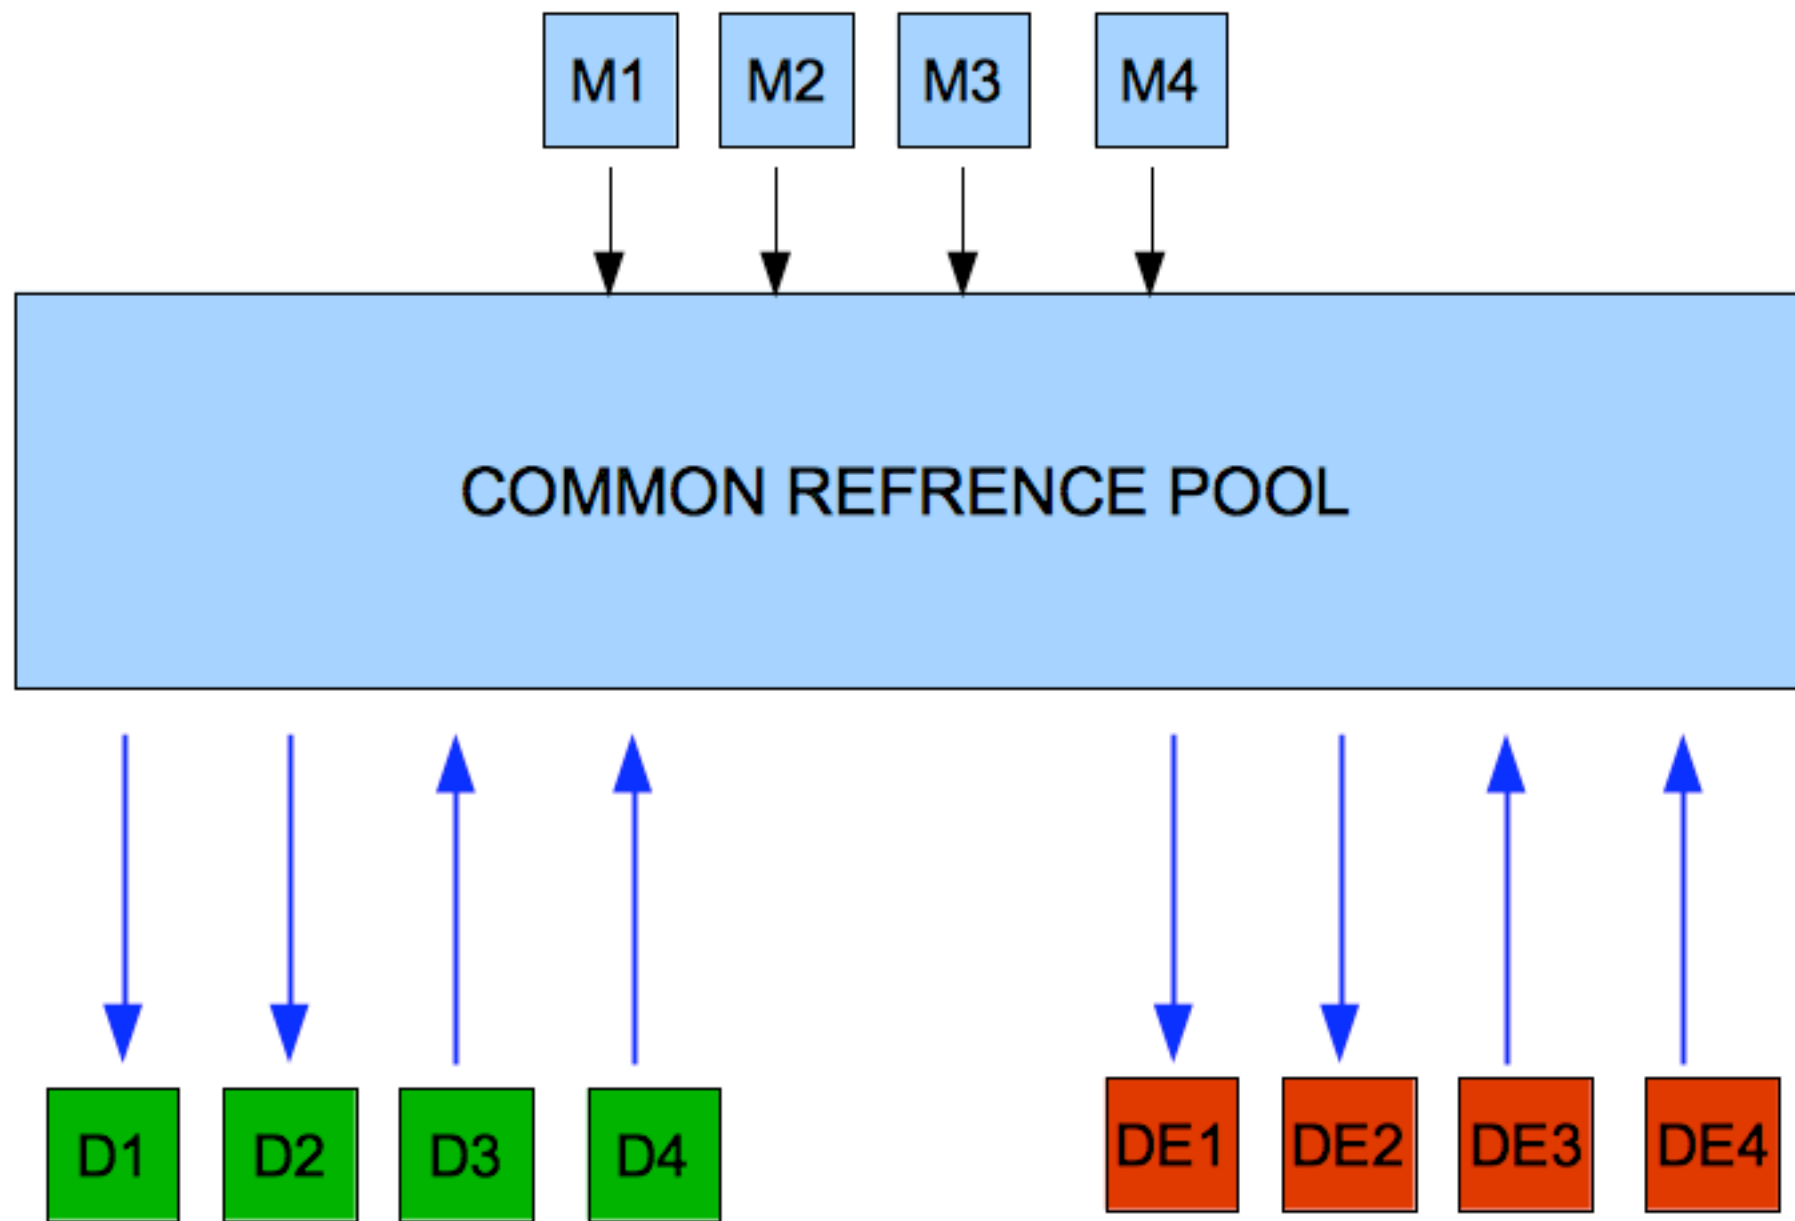

Cumulative distribution of fold changes of *P. pacificus* pioneer genes, and *P. pacificus* genes with orthologs. KS test p-value < 2E-16

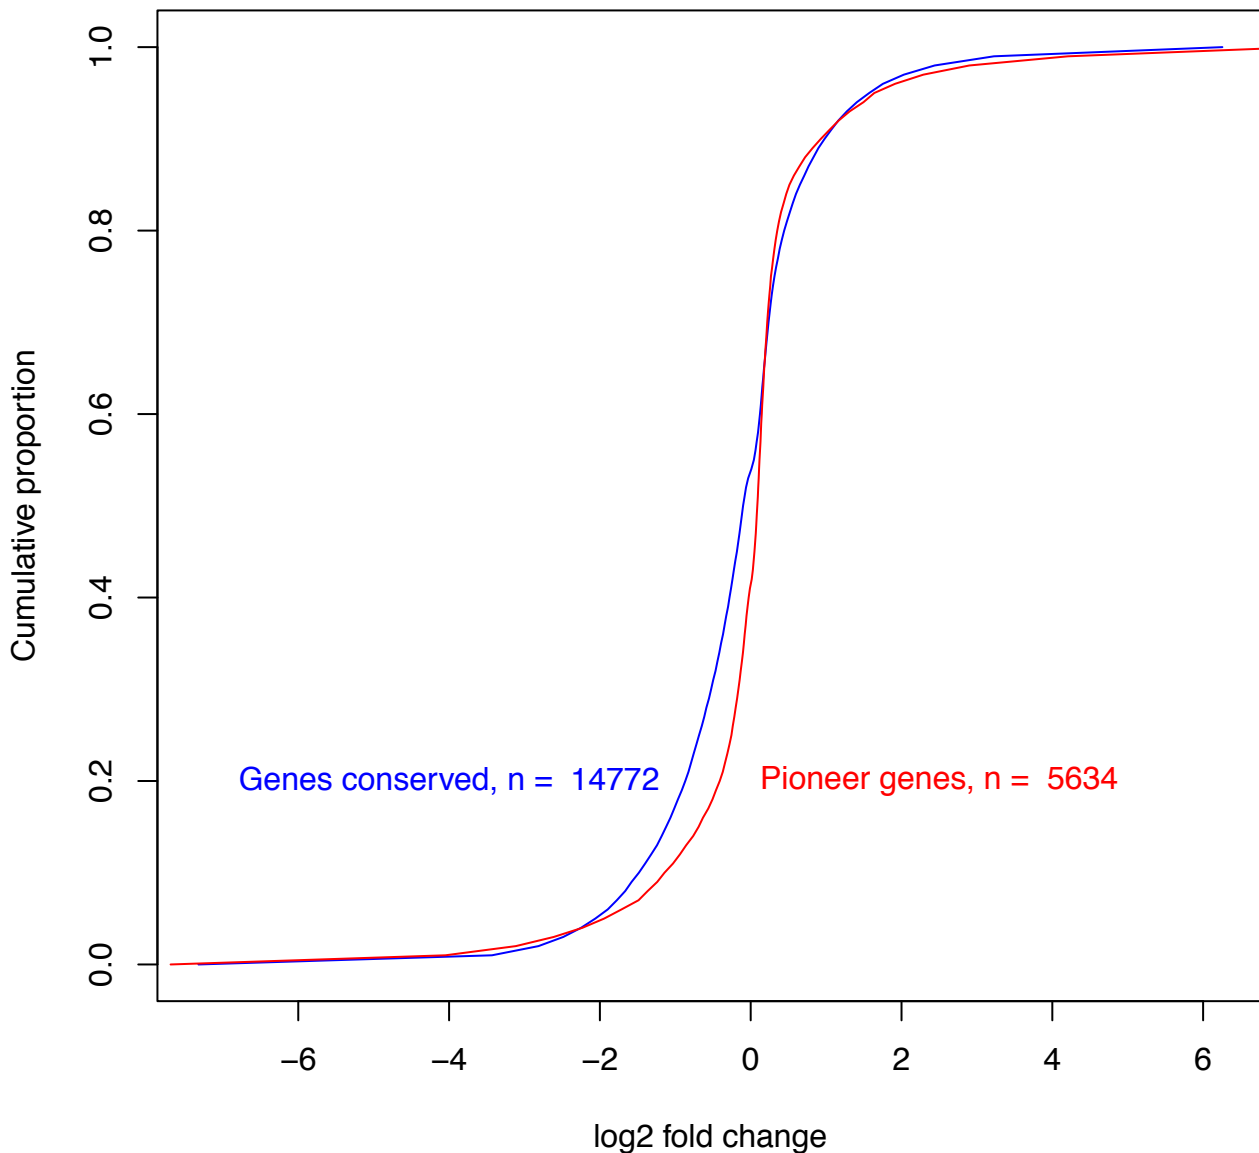

Supplement: 1471-2164-13-254-S1.pdf [file 1471-2164-13-254-S1.pdf]
